# Supplementary material for: Identification of ncRNA-Mediated Functions of Nucleus-Localized miR-320 in Cardiomyocytes
Source: PubMed Central journal article supplement — Mol Ther Nucleic Acids. 2019 Nov 18;19:132–43. doi: 10.1016/j.omtn.2019.11.006 (PMC6920229; doi:10.1016/j.omtn.2019.11.006), 2019-11-18
Supplement: mmc1.pdf [file mmc1.pdf]

**OMTN, Volume 19**

**Supplemental Information**

**Identification of ncRNA-Mediated**

**Functions of Nucleus-Localized**

**miR-320 in Cardiomyocytes**

**Huaping Li, Jiabing Zhan, Yanru Zhao, Jiahui Fan, Shuai Yuan, Zhongwei Yin, Beibei Dai, Chen Chen, and Dao Wen Wang**

**Supplemental Table 1. Primers.**

| <b>Gene</b>      | <b>Forward (5'-3')</b>  | <b>Reverse (5'-3')</b>    |
|------------------|-------------------------|---------------------------|
| h-pbk            | GTGTTTTAAGTCAGCATGAGCA  | AAGCACTTGGAATTGTACTIONGGG |
| h-SMCHD1         | TTTCCTTTGGAAGAAGAAACCA  | TTGAGCAAATACTGAGGTTTCATG  |
| h-cep57          | TACATAGAAAGAGAGCCCAAG   | CAAACAAGGAGATAACAGGAG     |
| h-micall2        | AGTACAAGTCCGGGTTCCG     | TCCGCTTGTCCAAGATCTG       |
| h-sorbs3         | TTTACATTCTCTTCCAGAGGGG  | TATCACCCCGCACTGTGG        |
| h-cnksr1         | TTTATTTGGTTGGAAAGTAGCCC | TCCCCTGGATTCTGTTCAGG      |
| h-rnf207         | TGCTATCAACGGAAGTCG      | GGGAAGTTCCACACAGTAATC     |
| h-Mrpl54         | CTCAAGGACCCCGACGTATG    | ACTCAGCATCCGGTTTCAGG      |
| h-mex3a          | TCTCCTCTGTGTTGGTCGC     | CTCCACTCTTTACCCACAAAGG    |
| h-fscn2          | CAGCCACACAAGTTTCTGCC    | AACTCTTCGTCCTTGCCTGG      |
| h-ptgir          | AAATAACCAGTGGCCTGGC     | TTGGGCCTCCTAAGTGGAC       |
| h-vps37d         | CCTGCTTCAGGATGAGCCCAA   | GGTATTTGATGGCCAGGGCAG     |
| h-ACTB           | AGCGAGCATCCCCAAAGTT     | GGGCACGAAGGCTCATCATT      |
| r-cep57-promoter | TCTGTCCCGGAAAGTGAAGC    | GTCCTTAGTGGATGCGGAGG      |
| r-fscn2-promoter | CAGAGGGTGAGGTAGGTCCA    | TACATGTGCGTGGGTCACAA      |
| U6               | CTCGCTTCGGCAGCACA       | AACGCTTCACGAATTTGCGT      |
| miR-320          | GCAGAGAAAAGCTGGGTTGAG   | CCAGTGCAGGGTCCGAGGTA      |

---

|                  |                       |                      |
|------------------|-----------------------|----------------------|
| r-pbk            | CCGAGTGTGTGACTGTGGAC  | AATGGGACAACCCTCTCGGA |
| r-SMCHD1         | CTGGTCCCCCTCATCGACTA  | CACCGAGGAACTTACAGGGG |
| r-cep57          | CTTTGGTGCACAGCCACATT  | AGGCGCCACTGACTTCTTAC |
| r-micall2        | CTGCGAATAGCAAAGCGACC  | GCACAGATAGATGAGCGCCT |
| r-sorbs3         | CAAGCAGCAAGGACGTGAAC  | TTGGAGGACACAGGATGTGC |
| r-cnksr1         | TACCCGGTGGTTTTATGGGC  | AGGGCTTGTACACATCGTGG |
| r-rnf207         | CGCGGATCGCTTCTGAGTAT  | CATACAGGTTCTGCCGATGC |
| r-Mrpl54         | TAGAACCGGAGTCCCGAGAG  | TGCCGCAGGTCCCTTTATTT |
| r-mex3a          | GCCTAGTCTAGTGCTCTGCG  | GTCTTGGCTCTCAGTGCCTT |
| r-fscn2          | TGGAGGTGGGTTCTGGTACA  | GGAAATCCTCCGCCAAGTCA |
| r-ptgir          | GGGGAACCTGGGAGTTGACTG | GCAAGAACCTGCCATACCCT |
| r-vps37d         | GGACTTCGGTCACCAAGGAA  | AGTTAGCCTTGGCGGTTGTT |
| r-ACTB           | CACCCGCGAGTACAACCTTC  | CCCATAACCACCATCACACC |
| m-cep57-promoter | GGCTCGCCCATATAATGCC   | TTGTACGCCTGCACCAAGT  |
| m-fscn2-promoter | GTAAAAGCCACAGGCCAAGC  | GGGCATGATGCTCTTCCCTT |
| h-cep57-promoter | AGGGGGTTGCTGTTTAGCTG  | GTTGGGAGGAGCCATCGAAT |
| h-fscn2-promoter | AGGCAGCACCCCTAGCTTGTA | CAGTTTCCAGGGGACTGAGG |
| m-cep57          | GGGCAGCAGAGTTACAGAGT  | TGCACAGGGCTTTACTGTGG |
| m-fscn2          | TGGGAGCCAAGGGTCAGATA  | AGACCGTTGGTTGGCATCTT |

---

---

|                         |                              |
|-------------------------|------------------------------|
| ChIRP-probe 1 (m-cep57) | ctggaaggcgtctatcaaga-biotin  |
| ChIRP-probe 2 (m-cep57) | cgctctcagagcgcgaaatc-biotin  |
| ChIRP-probe 3 (m-cep57) | agtcaagtgctgaaatgtc-biotin   |
| ChIRP-probe 1 (m-fscn2) | gagagtcagcaggggaacata-biotin |
| ChIRP-probe 2 (m-fscn2) | aggaaaggatgactggggtc-biotin  |
| ChIRP-probe 3 (m-fscn2) | gaaggactagactctcaggg-biotin  |
| ChIRP-probe 1 (control) | tagccagctttcatcaacat-biotin  |
| ChIRP-probe 2 (control) | agcagcagaccatttcaat-biotin   |
| ChIRP-probe 3 (control) | gtgtgggccataattcaatt-biotin  |

siRNAs to promoter RNAs

siRNA cocktail designed by Riobio Co., Ltd (Guangzhou, China)

---

h, human; r, rat; m, mouse

**Supplemental Table 2. Function of promoter ncRNAs (literature review).**

| <b>Promoter ncRNAs</b>           | <b>Sense/Antisense</b> | <b>Effects on downstream gene</b> | <b>References</b>                      |
|----------------------------------|------------------------|-----------------------------------|----------------------------------------|
| Cox-2 promoter RNA               | Sense                  | Activation                        | Nucleic Acids Res. 2013;41:10086       |
| Fbp1 precursor ncRNAs            | Sense                  | Activation                        | Nature. 2008;456:130                   |
| Dsx1-promoter ncRNA              | Sense                  | Activation                        | Curr Biol. 2018;28:1811                |
| CCND1 promoter RNA               | Antisense              | Repression                        | Nature. 2008;454:126                   |
| CMV promoter RNA                 | Antisense              | Repression                        | RNA. 2014;20:1916                      |
| PHO5 promoter RNA                | Antisense              | Activation                        | Proc Natl Acad Sci USA. 2007;104:8011  |
| DLX5/6 promoter RNA              | Antisense              | Activation                        | Genes Dev. 2006;20:1470                |
| HOXA Antisense RNA (HOTTIP)      | Antisense              | Activation                        | Nature. 2011;472:120                   |
| FLO11-promoter RNA ICR1 and PWR1 | Sense/Antisense        | Repression/Activation             | Proc Natl Acad Sci USA. 2009;106:18321 |
| SAP30L-AS1                       | Antisense              | Repression                        | Gene. 2018;690:120                     |
| ILF3-AS1                         | Antisense              | Activation                        | Cancer Manag Res. 2018;10:6791         |
| FZD6-promoter ncRNA              | Antisense              | Activation                        | Oncogene. 2018;37:3098                 |
| SMN-AS1                          | Antisense              | Repression                        | Neuron. 2017;93:66                     |
